# Supplementary material
Source: publisher figshare collection journal article supplement (https://acs.figshare.com/ndownloader/files/7895983)
Supplement: Supplementary file 1 [file 7895983]

## Supporting Information

# An Unusual Non-Emissive Behaviour of Rubrene J-Aggregates: a Rare Violation

*Nikhil Aggarwal and Archita Patnaik\**

Colloid and Interface Chemistry Laboratory, Department of Chemistry, Indian Institute of  
Technology Madras, Chennai 600036, India

Table S1: The optical signatures of RB monomer and RB J-aggregate obtained via steady state UV-vis absorption spectroscopy.

|                | Absorption wavelength, $\lambda$ (nm) | $\epsilon_{\max}$ (L.mol <sup>-1</sup> .cm <sup>-1</sup> ) | FWHM (cm <sup>-1</sup> ) | Area under the absorption band, $\int \epsilon. d\bar{\nu}$ , | Oscillator strength, $f = 4.32 \times 10^{-9} \int \epsilon. d\bar{\nu}$ | Transition Dipole Moment, $\vec{M}$ (D) = $0.461 \times \sqrt{f \times \lambda \text{ (nm)}}$ |
|----------------|---------------------------------------|------------------------------------------------------------|--------------------------|---------------------------------------------------------------|--------------------------------------------------------------------------|-----------------------------------------------------------------------------------------------|
| RB Monomer     | 526                                   | 6616.2                                                     | 1042                     | 7345241.4                                                     | 0.032                                                                    | 1.88                                                                                          |
| RB J-Aggregate | 531                                   | 6099.7                                                     | 1073                     | 6651214.7                                                     | 0.029                                                                    | 1.80                                                                                          |

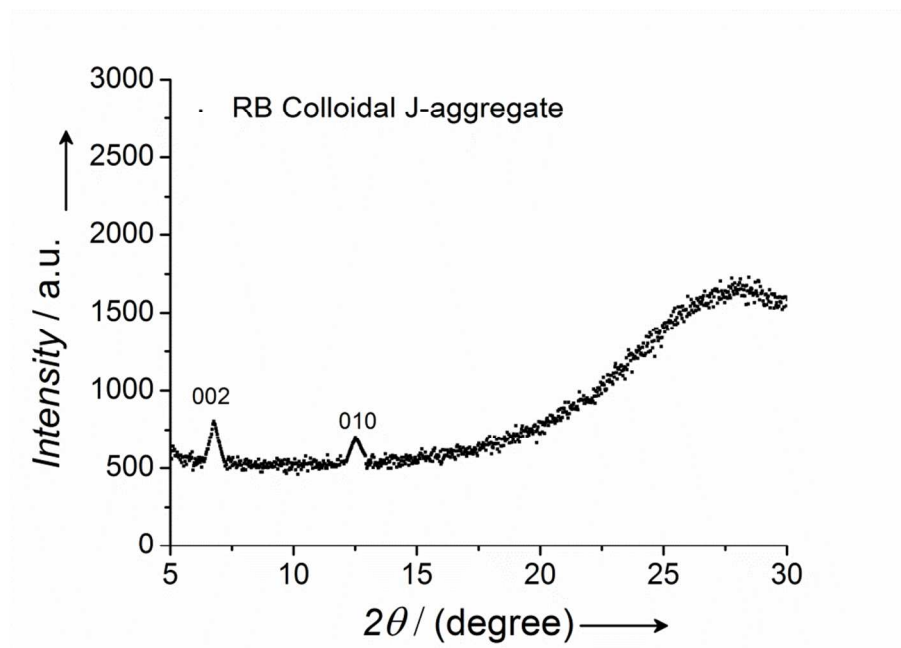

Figure S1. XRD patterns of as-prepared spherical RB colloidal J-aggregates in THF-Water binary (water volume fraction = 0.97) mixture resembling the rhombic crystal lattice.

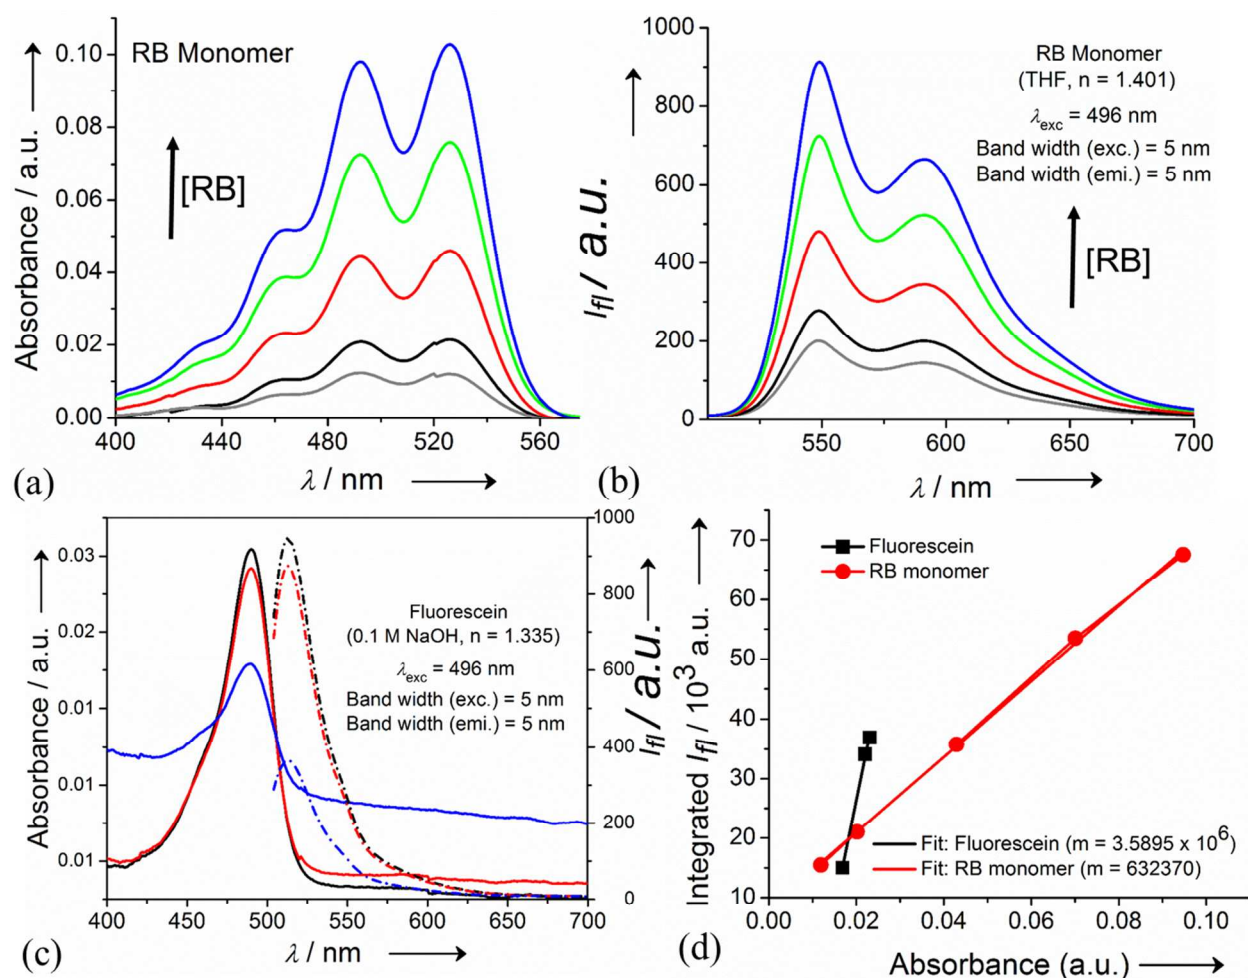

Figure S2 (a) and (b) UV-vis absorption and corresponding emission spectra of RB monomer in THF for estimation of PL quantum yield. (c) UV-vis absorption and corresponding emission spectra of Fluorescein standard in different concentrations in 0.1 M NaOH solution. (d) The integrated fluorescence intensity vs. absorbance of RB monomer and Fluorescein obtained from (a), (b) and (c), following a straight line equation with their corresponding slopes 'm'.

$$\phi_{\text{mon}} = \frac{m_{\text{mon}} \cdot n_{\text{THF}}}{m_{\text{fluo}} \cdot n_{\text{NaOH (0.1M)}}} \phi_{\text{fluo}} = \frac{632370}{3589500} \frac{1.407}{1.335} 0.925 = 0.172$$

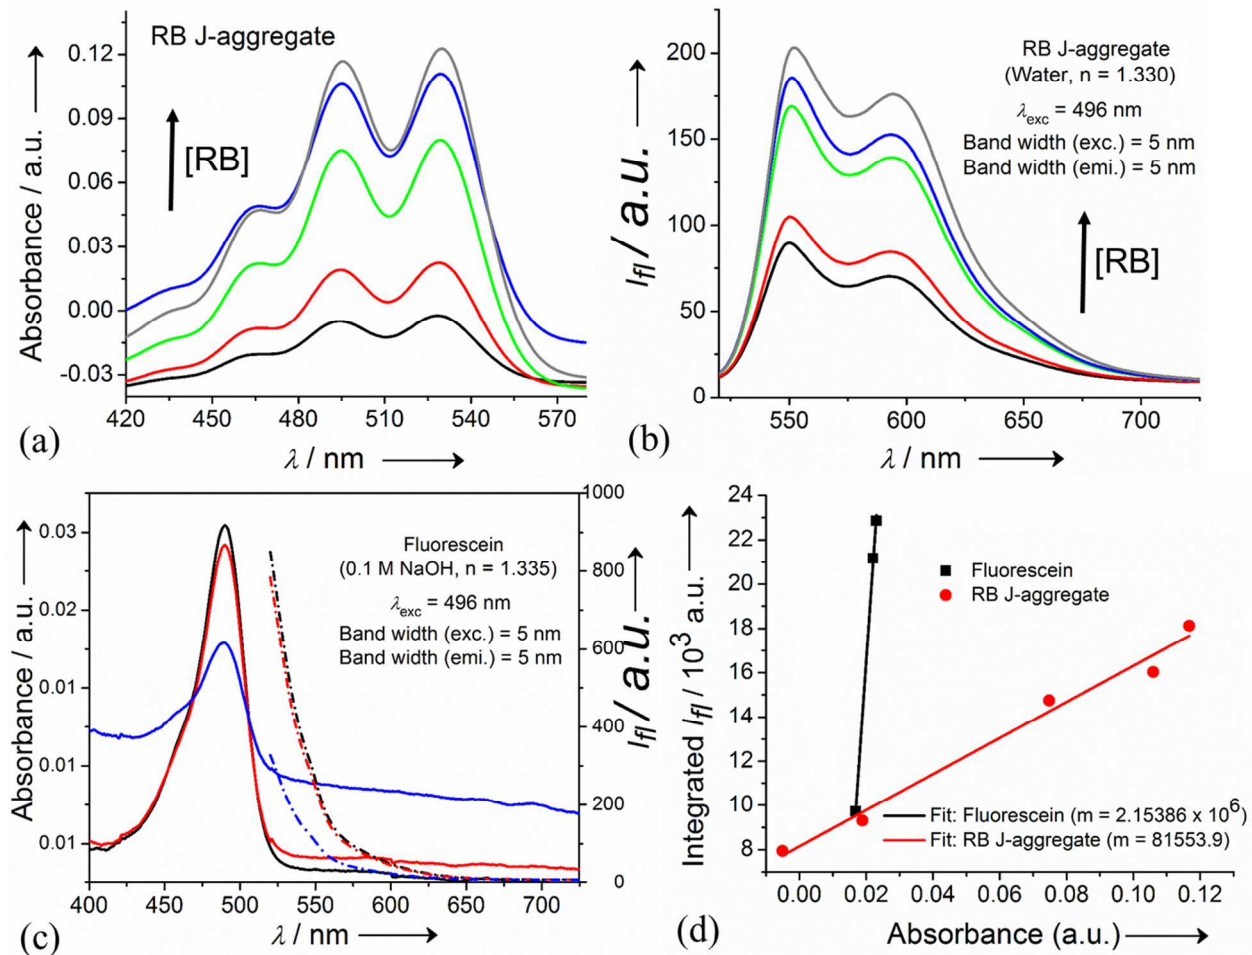

Figure S3 (a) and (b) UV-vis absorption and corresponding emission spectra of RB J-aggregate in THF: water binary mixture ( $f_w = 0.97$ ) for photoluminescence quantum yield calculation. (c) UV-vis absorption and corresponding emission spectra of Fluorescein reference in different concentrations in 0.1 M NaOH solution. (d) The integrated fluorescence intensity vs. absorbance of RB J-aggregates and Fluorescein obtained from (a), (b) and (c), following a straight line equation with corresponding slopes 'm'.

$$\phi_{agg} = \frac{m_{agg} \cdot n_{water}}{m_{fluor} \cdot n_{NaOH (0.1 M)}} \phi_{fluor} = \frac{81553.9}{2153860} \frac{1.330}{1.335} 0.925 = 0.035$$

$S_1$  excited state characteristics: 2.22 eV,  $f = 0.185$ ,  $\vec{M}_{\lambda,a}^{mon} = 4.68 \text{ D}$

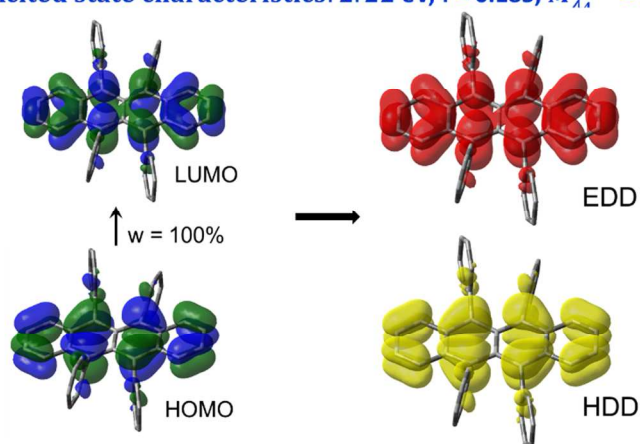

Figure S4. Associated molecular orbitals, the oscillator strength and the weight of the 2.22 eV transition of the RB monomer, computed via TD-DFT-B3LYP/6-31G+(d,p) level with IEFPCM in THF. Electron (EDD) and hole (HDD) density distribution maps associated with the monomer excited state corresponding to 2.22 eV electronic transition.

Table S2: Computed Centroid Coordinates of EDD and HDD for  $S_1$  Excited State of RB Monomer.

| RB monomer<br>( $S_1$ excited<br>state) | Centroid Coordinates |        |        |
|-----------------------------------------|----------------------|--------|--------|
|                                         | X (Å)                | Y (Å)  | Z (Å)  |
| EDD                                     | 0.211                | -0.097 | 0.0131 |
| HDD                                     | -0.379               | -0.025 | 0.0126 |

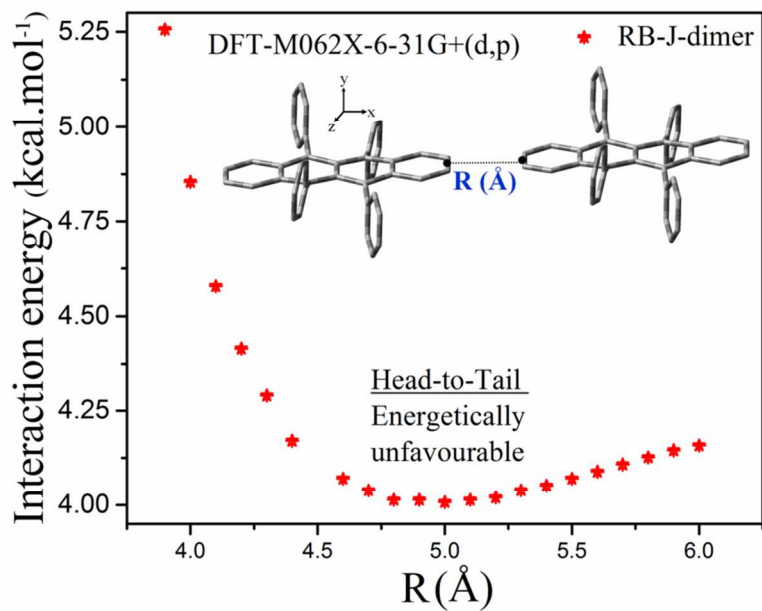

Figure S5. The equilibrium positive interaction energy on the computed potential energy curve discards the formation of a Rubrene ideal J-dimer ( $\theta = 0^\circ$ ).

Table S3: Computed indexes towards characterization of low lying dark and bright singlet states in Rubrene J-dimer.

| Excited state  | Energy (eV) | Oscillator strength | $\phi_{C^+C^-}$ | t-index |       |       | Character |
|----------------|-------------|---------------------|-----------------|---------|-------|-------|-----------|
|                |             |                     |                 | x (Å)   | y (Å) | z (Å) |           |
| S <sub>1</sub> | 2.53        | 0.283               | 0.959           | -1.94   | -4.61 | -1.45 | LE        |
| S <sub>2</sub> | 2.55        | 0.000               | 0.957           | -1.981  | -4.67 | -1.45 | LE        |
| S <sub>3</sub> | 3.08        | 0.000               | 0.957           | -1.97   | -4.72 | -1.46 | LE        |
| S <sub>4</sub> | 3.14        | 0.047               | 0.955           | -1.97   | -4.67 | -1.47 | LE        |
| S <sub>5</sub> | 3.54        | 0.000               | 0.825           | -1.86   | -4.17 | -2.28 | LE        |
| S <sub>6</sub> | 3.56        | 0.000               | 0.767           | -1.928  | -4.29 | -2.28 | LE        |
